# Supplementary material for: EDTA-treated cotton-thread microfluidic device used for one-step whole blood plasma separation and assay
Source: Royal Society of Chemistry journal article supplement (doi:10.1039/c6lc00175k), 2016-01-01
Supplement: c6lc00175k3.pdf [file c6lc00175k3.pdf]

## SUPPORTING INFORMATION

### **EDTA-treated cotton-thread microfluidic device for one-step whole blood plasma separation and assay**

Mokhamad Fakhrul Ulum<sup>1,2</sup>, Leni Maylina<sup>2</sup>, Deni Noviana<sup>2,\*\*</sup>,  
Dedy Hermawan Bagus Wicaksono<sup>1,3,\*</sup>

- 
- 1) *Medical Devices and Technology Group (MediTeg), Faculty of Biosciences and Medical Engineering, Universiti Teknologi Malaysia (UTM), Skudai 81310, Johor Malaysia. E-mail: [dedy.wicaksono@gmail.com](mailto:dedy.wicaksono@gmail.com), [dedy@utm.my](mailto:dedy@utm.my)*
  - 2) *Faculty of Veterinary Medicine, Bogor Agricultural University (IPB), Bogor Indonesia. E-mail: [deni@ipb.ac.id](mailto:deni@ipb.ac.id)*
  - 3) *IJN-UTM Cardiovascular Engineering Centre (CEC), Faculty of Biosciences and Medical Engineering, Universiti Teknologi Malaysia (UTM), Skudai 81310, Johor Malaysia. E-mail: [dedy.wicaksono@gmail.com](mailto:dedy.wicaksono@gmail.com), [dedy@utm.my](mailto:dedy@utm.my)*

† Electronic Supplementary Information (ESI) available. See DOI: 10.1039/x0xx00000x

## S1 Cotton-thread for $\mu$ TAD fabrication

**Figure S1** represents cotton thread that is used in the study of cotton-thread microfluidic device for whole blood plasma separation. Cotton thread has specification of 100 % cotton with 32 twists per inch (TPI).

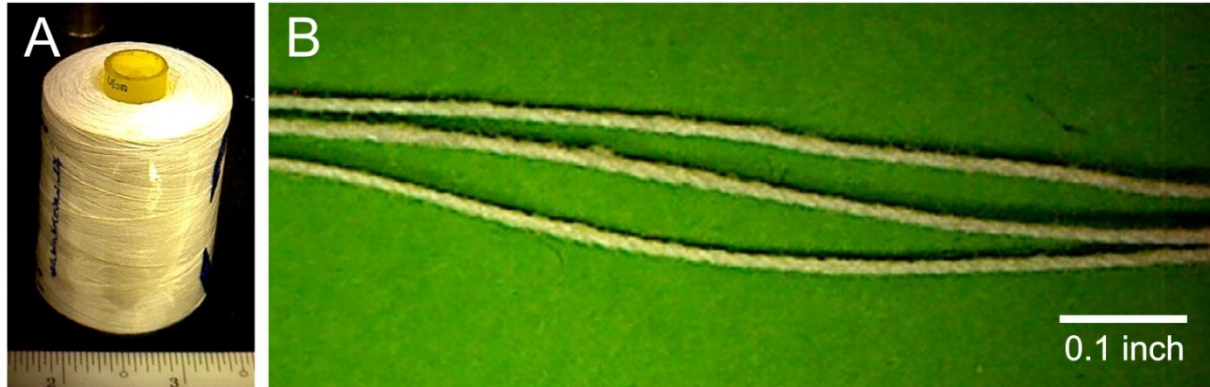

**Figure S1:** Commercial 100 % cotton thread for blood plasma separation, where (A) yarn and (B) close-up view of the cotton thread.

## S2 Evidences of $\mu$ TAD after blood separation test

**Figure S2** represents the evidences of  $\mu$ TAD that showing different wicking ability and blood plasma separation. This difference was confirmed by measured the length of wicking and separated plasma among 12  $\mu$ TAD types. All tests were conducted at temperature of 30 °C.

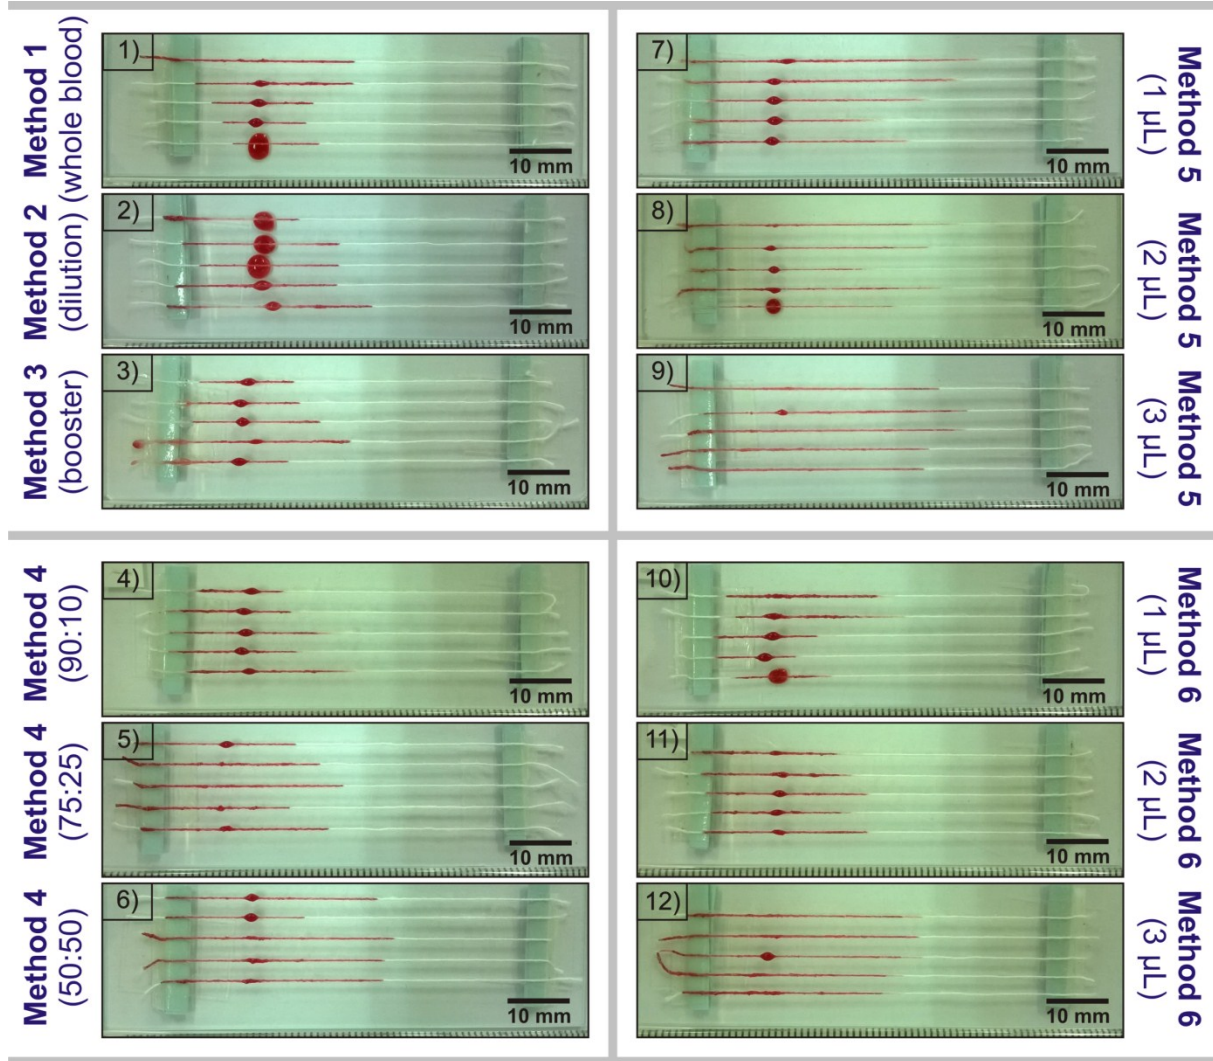

**Figure S2:** Post-separation blood test at several  $\mu$ TAD types, where (1) whole blood, (2) dilution, (3) booster, mixed of blood to EDTA in ratio of (4) 90:10, (5) 75:25, (6) 50:50, room-temperature-dried EDTA for 10 s treatments: (7) 1  $\mu$ L, (8) 2  $\mu$ L, (9) 3  $\mu$ L, refrigerated temperature-dried EDTA for 60 min treatments: (10) 1  $\mu$ L, (11) 2  $\mu$ L, (12) 3  $\mu$ L.

### S3 Wickability and blood plasma separation analysis

**Table S3.1** represents statistical analysis of length of blood wicking and plasma separation among 12 types of  $\mu$ TADs.

**Table S3.1:** Statistical analysis of length of blood wicking and plasma separation among 12 types of  $\mu$ TADs.

| Test | Treatments                            | n | Wicking length [mm]              | Plasma length [mm]            |
|------|---------------------------------------|---|----------------------------------|-------------------------------|
| (1)  | Whole blood                           | 5 | 22.7 $\pm$ 2.1 <sup>i,ii</sup>   | n/a                           |
| (2)  | Dilution                              |   |                                  |                               |
|      | 1:1                                   | 5 | 26.0 $\pm$ 4.4 <sup>i,ii</sup>   | n/a                           |
| (3)  | Booster                               |   |                                  |                               |
|      | 1:1                                   | 5 | 20.0 $\pm$ 3.6 <sup>i</sup>      | n/a                           |
| (4)  | Mixed (Blood : EDTA ratios)           |   |                                  |                               |
|      | 90:10                                 | 5 | 28.3 $\pm$ 1.5 <sup>ii,iii</sup> | n/a                           |
|      | 75:25                                 | 5 | 34.0 $\pm$ 1.0 <sup>iii,iv</sup> | n/a                           |
|      | 50:50                                 | 5 | 40.0 $\pm$ 3.0 <sup>iv,v</sup>   | n/a                           |
| (5)  | Room dried at 25 °C for 10 seconds    |   |                                  |                               |
|      | 1 $\mu$ L EDTA                        | 5 | 36.3 $\pm$ 0.6 <sup>iv</sup>     | 2.8 $\pm$ 0.3 <sup>i,ii</sup> |
|      | 2 $\mu$ L EDTA                        | 5 | 42.7 $\pm$ 1.5 <sup>v,vi</sup>   | 2.7 $\pm$ 1.2 <sup>i,ii</sup> |
|      | 3 $\mu$ L EDTA                        | 5 | 45.3 $\pm$ 2.9 <sup>vi</sup>     | 1.8 $\pm$ 0.3 <sup>i</sup>    |
| (6)  | Refrigerator dried at 4 °C for 60 min |   |                                  |                               |
|      | 1 $\mu$ L EDTA                        | 5 | 27.0 $\pm$ 1.7 <sup>ii</sup>     | 3.0 $\pm$ 1.0 <sup>i,ii</sup> |
|      | 2 $\mu$ L EDTA                        | 5 | 28.7 $\pm$ 4.2 <sup>ii,iii</sup> | 3.7 $\pm$ 0.6 <sup>ii</sup>   |
|      | 3 $\mu$ L EDTA                        | 5 | 24.7 $\pm$ 4.9 <sup>i,ii</sup>   | 3.0 $\pm$ 0.0 <sup>i,ii</sup> |

Description: data was displayed in the average  $\pm$  standard deviation ( $\bar{x} \pm \text{sd}$ ). The same superscript small roman letters in one column showed no significant differences ( $P > 0.05$ ). n/a = not available.

**Table S3.2** represents one-way Analysis of Variance (ANOVA) of the length of blood wicking and plasma separation among 12 types of  $\mu$ TAD. Results show that wickability of blood were significantly different between 12 types of  $\mu$ TAD ( $P < 0.05$ ). However, plasma separation was not significantly different between room and refrigerator dried of  $\mu$ TAD ( $P > 0.05$ ).

**Table S3.2:** One-way ANOVA test of blood wicking among 12 types of  $\mu$ TAD and plasma separation between room dried and refrigerator dried of  $\mu$ TAD

|             |                | Sum of Squares | df | Mean Square | F      | Sig. |
|-------------|----------------|----------------|----|-------------|--------|------|
| Wickability | Between Groups | 2179.556       | 11 | 198.141     | 18.104 | .000 |
|             | Within Groups  | 262.667        | 24 | 10.944      |        |      |
|             | Total          | 2442.222       | 35 |             |        |      |
| Separation  | Between Groups | 5.333          | 5  | 1.067       | 2.259  | .115 |
|             | Within Groups  | 5.667          | 12 | .472        |        |      |
|             | Total          | 11.000         | 17 |             |        |      |

**Table S3.3** represent post hoc Duncan of the length of blood wicking among 12 types of  $\mu$ TAD. Results show that wickability of blood has 6 subset and alpha value at 0.05 among 12 types of  $\mu$ TAD. This subset further used for superscripts annotation at table S3.1.

**Table S3.3:** Post hoc Duncan test of wickability analysis among 12 types of  $\mu$ TAD

| Test                                                   | Treatment              | N | Subset for alpha = 0.05 |         |         |         |         |         | Superscript<br>(small roman) |
|--------------------------------------------------------|------------------------|---|-------------------------|---------|---------|---------|---------|---------|------------------------------|
|                                                        |                        |   | 1                       | 2       | 3       | 4       | 5       | 6       |                              |
| (3)                                                    | Booster 1:1            | 3 | 20.0000                 |         |         |         |         |         | i                            |
| (1)                                                    | Whole blood            | 3 | 22.6667                 | 22.6667 |         |         |         |         | i,ii                         |
| (12)                                                   | Refrigerator 3 $\mu$ L | 3 | 24.6667                 | 24.6667 |         |         |         |         | i,ii                         |
| (2)                                                    | Dilution 1:1           | 3 | 26.0000                 | 26.0000 |         |         |         |         | i,ii                         |
| (10)                                                   | Refrigerator 1 $\mu$ L | 3 |                         | 27.0000 |         |         |         |         | ii                           |
| (4)                                                    | Mixed 90:10            | 3 |                         | 28.3333 | 28.3333 |         |         |         | ii,iii                       |
| (11)                                                   | Refrigerator 2 $\mu$ L | 3 |                         | 28.6667 | 28.6667 |         |         |         | ii,iii                       |
| (5)                                                    | Mixed 75:25            | 3 |                         |         | 34.0000 | 34.0000 |         |         | iii,iv                       |
| (7)                                                    | Room 1 $\mu$ L         | 3 |                         |         |         | 36.3333 |         |         | iv                           |
| (6)                                                    | Mixed 50:50            | 3 |                         |         |         | 39.0000 | 39.0000 |         | iv,v                         |
| (8)                                                    | Room 2 $\mu$ L         | 3 |                         |         |         |         | 42.6667 | 42.6667 | v,vi                         |
| (9)                                                    | Room 3 $\mu$ L         | 3 |                         |         |         |         |         | 45.3333 | vi                           |
| Sig.                                                   |                        |   | .051                    | .060    | .057    | .092    | .187    | .333    |                              |
| Means for groups in homogeneous subsets are displayed. |                        |   |                         |         |         |         |         |         |                              |

**Table S3.4** represent post hoc Duncan of the length of plasma separation between room dried and refrigerator dried of  $\mu$ TAD. Results show that plasma separation has only 2 subset and alpha value 0.05 between room dried and refrigerator dried of  $\mu$ TAD. This subset was used for superscripts annotation at table S3.1.

**Table S3.4:** Post hoc Duncan test of plasma separation analysis between room dried and refrigerator dried of  $\mu$ TAD

| Test                                                   | Treatment              | N | Subset for alpha = 0.05 |        | Superscript<br>(small roman) |
|--------------------------------------------------------|------------------------|---|-------------------------|--------|------------------------------|
|                                                        |                        |   | 1                       | 2      |                              |
| (9)                                                    | Room 3 $\mu$ L         | 3 | 1.8333                  |        | i                            |
| (8)                                                    | Room 2 $\mu$ L         | 3 | 2.6667                  | 2.6667 | i,ii                         |
| (7)                                                    | Room 1 $\mu$ L         | 3 | 2.8333                  | 2.8333 | i,ii                         |
| (10)                                                   | Refrigerator 1 $\mu$ L | 3 | 3.0000                  | 3.0000 | i,ii                         |
| (12)                                                   | Refrigerator 3 $\mu$ L | 3 | 3.0000                  | 3.0000 | i,ii                         |
| (11)                                                   | Refrigerator 2 $\mu$ L | 3 |                         | 3.6667 | ii                           |
| Sig.                                                   |                        |   | .082                    | .129   |                              |
| Means for groups in homogeneous subsets are displayed. |                        |   |                         |        |                              |

## S4 Time-lapse of $\mu$ TAD after blood separations test

**Figure S4** depicts time-lapse of blood wicking and plasma separation among 12 types of  $\mu$ TAD that was recorded up to 120 s.

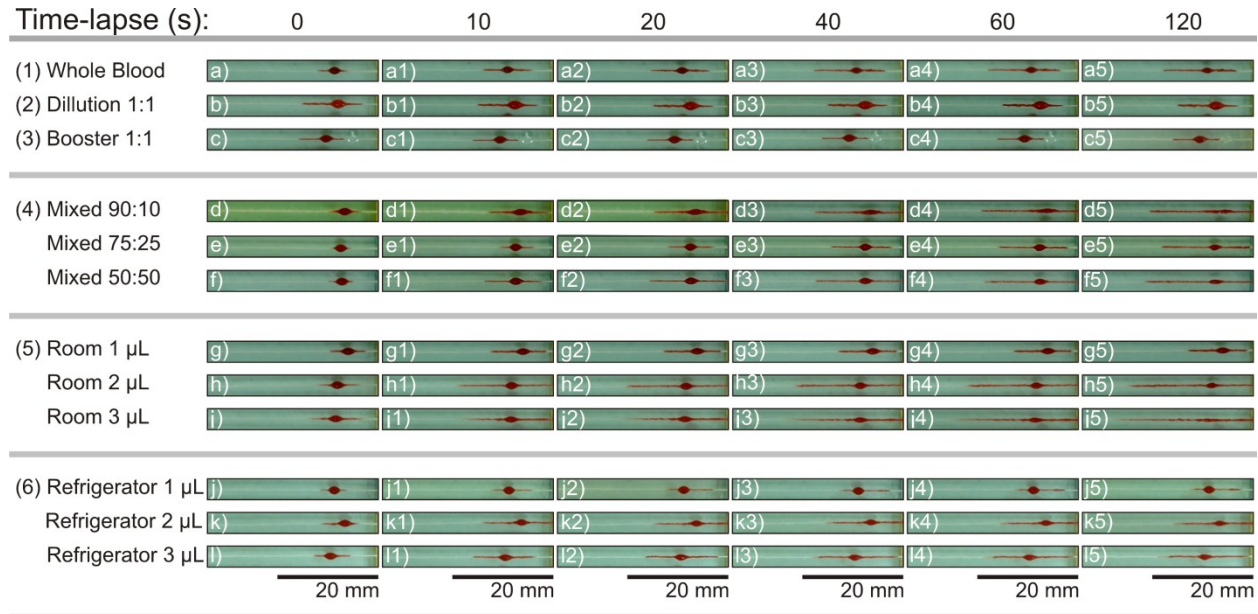

**Figure S4:** Time-lapse of blood test among 12 types of  $\mu$ TAD, where (a,a1-5) whole blood, (b,b1-5) dilution, (c,c1-5) booster, mixed of blood to EDTA in ratio of (d,d1-5) 90:10, (e,e1-5) 75:25, (f,f1-5) 50:50, room-temperature-dried EDTA for 10 s treatments: (g,g1-5) 1  $\mu$ L, (h,h1-5) 2  $\mu$ L, (i,i1-5) 3  $\mu$ L, refrigerated temperature-dried EDTA for 60 min treatments: (j,j1-5) 1  $\mu$ L, (k,k1-5) 2  $\mu$ L, (l,l1-5) 3  $\mu$ L.



## S5 Cell analysis of $\mu$ TAD after blood separations test

**Figure S5** represents giemsa staining of wet blood smear that depicts amount of the blood cells among 12 types of  $\mu$ TAD.

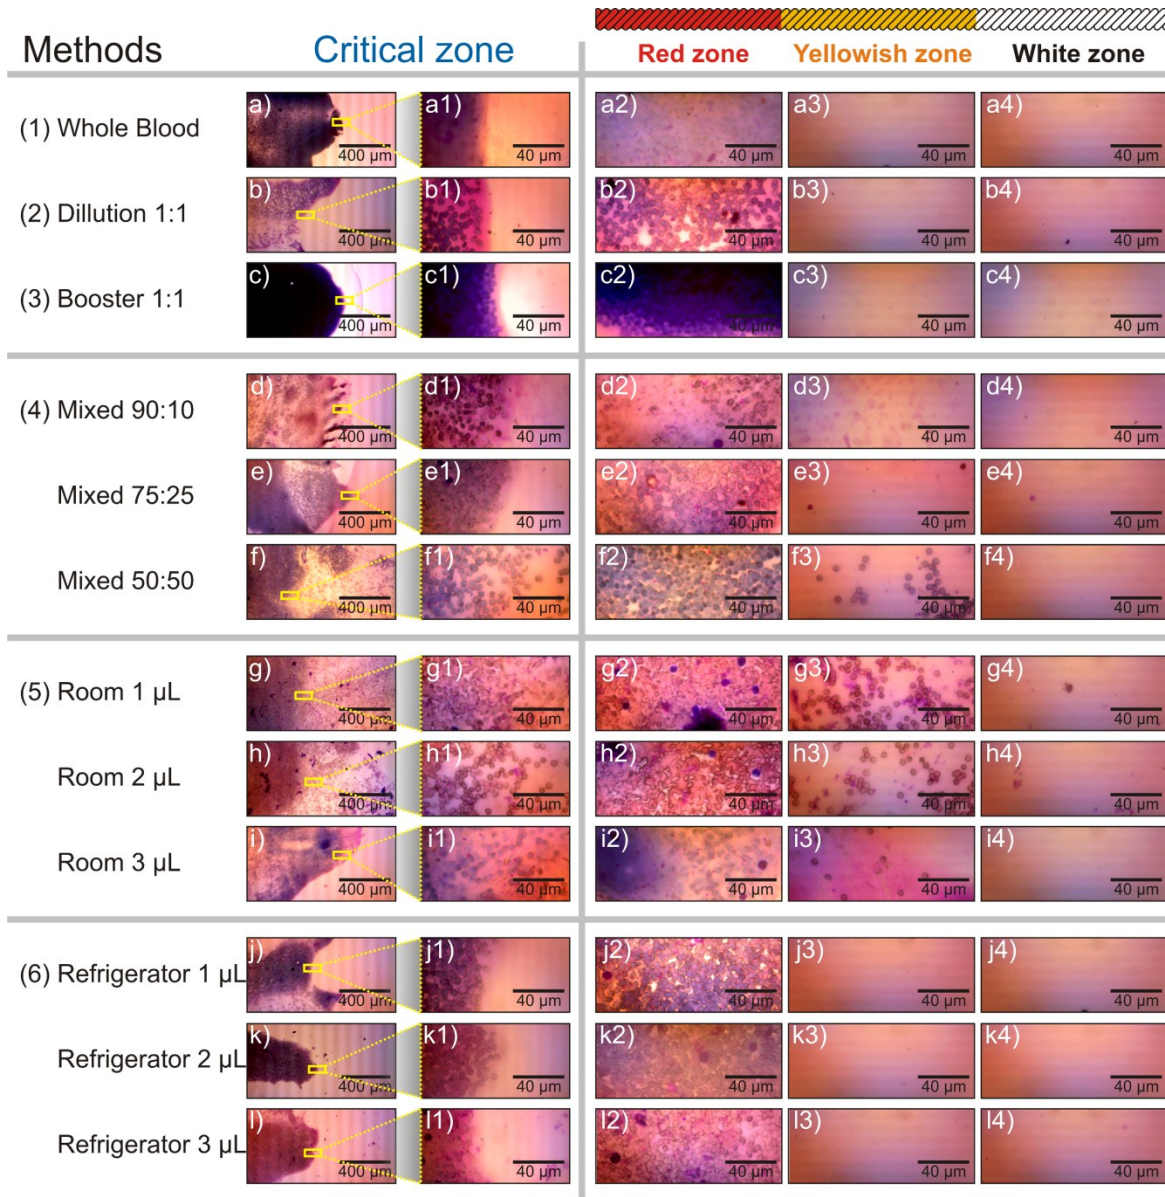

**Figure S5:** Cell analysis on several  $\mu$ TAD types, where (a,a1-4) whole blood, (b,b1-4) dilution, (c,c1-4) booster, mixed of blood to EDTA in ratio of (d,d1-4) 90:10, (e,e1-4) 75:25, (f,f1-4) 50:50, room-temperature-dried EDTA for 10 s treatments: (g,g1-4) 1  $\mu$ L, (h,h1-4) 2  $\mu$ L, (i,i1-4) 3  $\mu$ L, refrigerated temperature-dried EDTA for 60 min treatments: (j,j1-4) 1  $\mu$ L, (k,k1-4) 2  $\mu$ L, (l,l1-4) 3  $\mu$ L.



## S6 Sheep's blood haematocrit and total protein profile

**Figure S6** represents quantification measurement of haematocrit and total protein in sheep blood that used in this study.

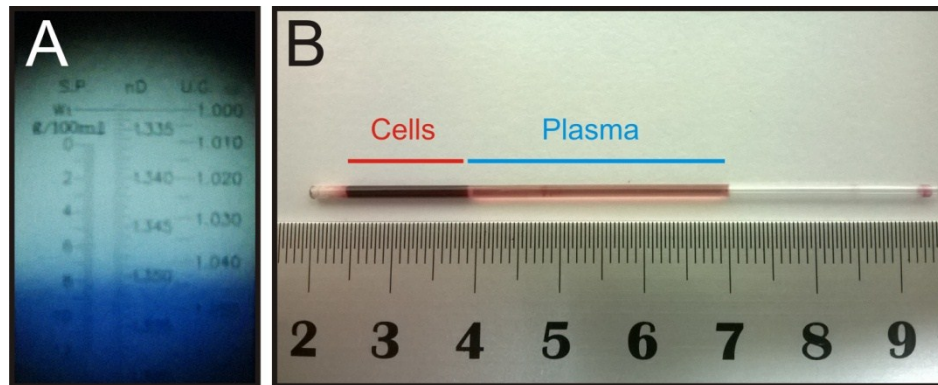

**Figure S6:** Total protein, specific gravity and haematocrit measurement of blood sheep, where (A) image of hand-refractometer from centrifuged blood plasma and (B) image of centrifuged blood in the capillary microhaematocrit tube for haematocrit calculation.

### Sheep blood profile:

#### 1. Haematocrit

$$\begin{aligned}
 \text{Plasma high} &= 3.1 \text{ cm} \\
 \text{High blood sediment (Ts)} &= 1.4 \text{ cm} \\
 \text{Total high (Th)} &= 4.5 \text{ cm} \\
 \text{Haematocrit} &= (Ts/Th) \times 100 \% \dots\dots\dots (1) \\
 &= (1.4/4.5) \times 100 \% = 31.11 \%
 \end{aligned}$$

$$2. \text{ Specific gravity} = 1.350$$

$$3. \text{ Total protein (g/dL)} = 8 \text{ g/dL}$$

#### 4. Albumin

$$\begin{aligned}
 \text{Albumin (g/dL)} &= 60 \% \times \text{Total protein} \dots\dots\dots (2) \\
 &= 0.6 \times 8 = 4.8 \text{ g/dL}
 \end{aligned}$$

## S7 Effect of voluminous to the efficacy of $\mu$ TAD

**Figure S7** represents effect of various volume deposition of EDTA-treat vs. blood on the  $\mu$ TAD that showing in the difference length (mm) on blood wicking and plasma separation.

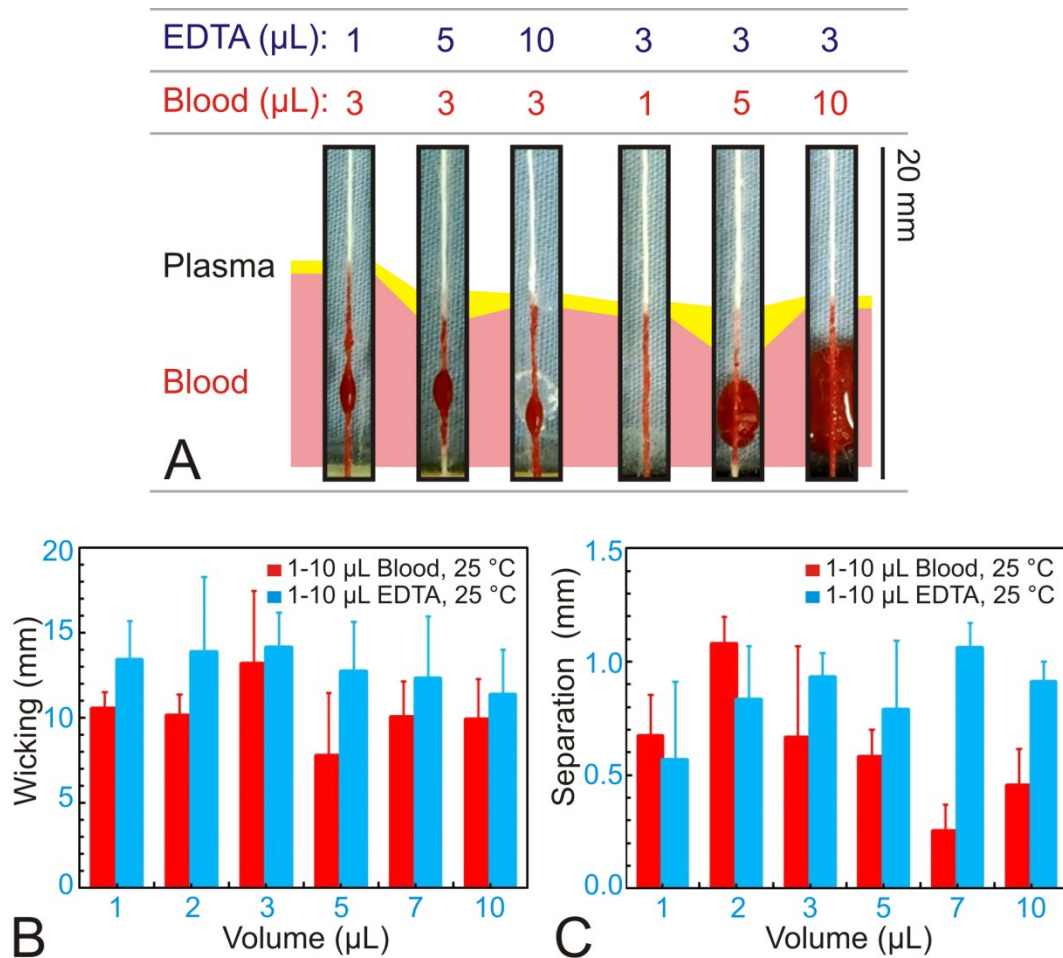

**Figure S7:** Variation of liquids volumes (EDTA-treatment vs. blood) on the blood wicking and plasma separation of  $\mu$ TAD. (A) Selected images from the testing with illustration of blood wicking and plasma separation that tested at 25 °C after 120 s, (B) length of blood wicking (mm), and (C) length of plasma separation.

## S8 Effect environmental temperature to the efficacy of $\mu$ TAD

**Figure S8** represents effect of environmental temperature to the blood wicking and plasma separation of  $\mu$ TAD. Effect of environmental temperature was studied by using 1-3  $\mu$ L of EDTA-treatment on cotton-thread with 3  $\mu$ L blood sample for 120 s.

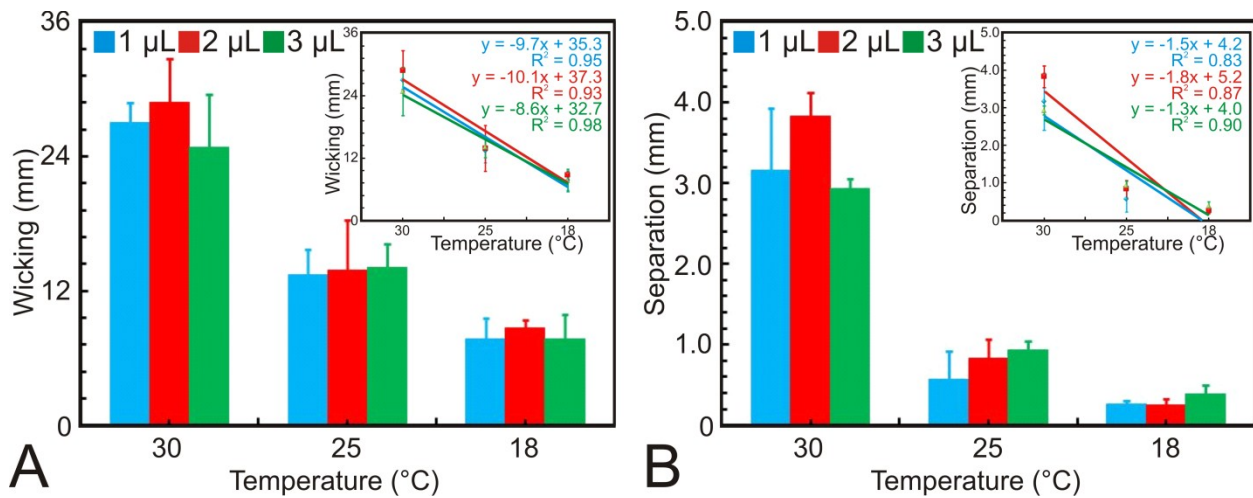

**Figure S8:** Effect of environmental temperature to the blood wicking and plasma separation of  $\mu$ TAD on the (A) length of blood wicking and (B) plasma separation.

## S9 Comparison with several finding on blood separation methods

**Table S9** shows comparison of several methods and findings on the blood plasma separation.

**Table S9:** Comparison methods and findings on blood plasma separation with our study

| No                                                                                                                                                                                                                          | Parameters       | Ref S10.1                                                           | Ref S10.2                                             | Ref S10.3                                           | This study                                |
|-----------------------------------------------------------------------------------------------------------------------------------------------------------------------------------------------------------------------------|------------------|---------------------------------------------------------------------|-------------------------------------------------------|-----------------------------------------------------|-------------------------------------------|
| 1.                                                                                                                                                                                                                          | Material         |                                                                     |                                                       |                                                     |                                           |
|                                                                                                                                                                                                                             | Length           | ~50 mm                                                              | 15 mm                                                 | ~20 mm                                              | 20 mm                                     |
|                                                                                                                                                                                                                             | Specification    | Nitrocellulose paper                                                | Filter paper                                          | Polyester thread                                    | Cotton thread                             |
| 2.                                                                                                                                                                                                                          | Pre-treatment    |                                                                     |                                                       |                                                     |                                           |
|                                                                                                                                                                                                                             | Type             | No need                                                             | Wax-impregnated                                       | Plasma-treatment                                    | Scouring                                  |
|                                                                                                                                                                                                                             | Method           | No data                                                             | Soldering iron-impregnated                            | Vacuum plasma                                       | Na <sub>2</sub> CO <sub>3</sub>           |
|                                                                                                                                                                                                                             | Time             | No data                                                             | >30 min                                               | 60 s                                                | 10min; boiled                             |
| 3.                                                                                                                                                                                                                          | Agent            |                                                                     |                                                       |                                                     |                                           |
|                                                                                                                                                                                                                             | Type             | CaCl <sub>2</sub>                                                   | NaCl / MgCl <sub>2</sub>                              | Anti-ABO and anti-Rh/D antibodies                   | Ethylene diamine tetra acetic acid        |
|                                                                                                                                                                                                                             | Concentrations   | 0.1-0.5 M                                                           | 0.154-0.68 M                                          | No data                                             | 10 %                                      |
|                                                                                                                                                                                                                             | Method           | Mixed with sample                                                   | Dropping                                              | Soaking                                             | Dropping                                  |
|                                                                                                                                                                                                                             | Volume           | 15 µL                                                               | 0.5 µL                                                | ~>1000 µL                                           | 1-3 µL                                    |
|                                                                                                                                                                                                                             | Preparation      | No need                                                             | 3 min; room temperature                               | 10 min; fume hood                                   | 60 min; refrigerator                      |
| 4.                                                                                                                                                                                                                          | Blood            |                                                                     |                                                       |                                                     |                                           |
|                                                                                                                                                                                                                             | Treatment        | Dilute blood (160 µL blood + 5 µL NaCl + 15 µL CaCl <sub>2</sub> )  | On-paper dilution (immobilized salt-solution)         | No need                                             | No need                                   |
| 5.                                                                                                                                                                                                                          | Working test     |                                                                     |                                                       |                                                     |                                           |
|                                                                                                                                                                                                                             | Volume           | 100 µL                                                              | 5 µL                                                  | 0.6-4 µL                                            | 1-3 µL                                    |
|                                                                                                                                                                                                                             | Time             | 240 s                                                               | 60 s                                                  | No data                                             | 30-120 s                                  |
|                                                                                                                                                                                                                             | Separation       | 4-8 mm                                                              | 2-3 mm                                                | 3 mm                                                | 3 mm                                      |
| 6.                                                                                                                                                                                                                          | Assay/Test       |                                                                     |                                                       |                                                     |                                           |
|                                                                                                                                                                                                                             | Type             | Blood clotting                                                      | Glucose                                               | Blood typing                                        | Albumin                                   |
|                                                                                                                                                                                                                             | Analysis         | Colorimetric                                                        | Colorimetric                                          | Colorimetric                                        | Colorimetric                              |
|                                                                                                                                                                                                                             | Agent            | CaCl <sub>2</sub>                                                   | 2,2-azino-bis(3-ethylbenzothiazoline-6-sulfonic acid) | Anti-ABO and anti-Rh/D antibodies                   | Bromcresol green                          |
|                                                                                                                                                                                                                             | Volume           | Dilute sample (160 µL blood + 5 µL NaCl + 15 µL CaCl <sub>2</sub> ) | 1 µL                                                  | Soaking (~>1000 µL)                                 | 1-3 µL                                    |
|                                                                                                                                                                                                                             | Preparation time | No data                                                             | 6 min; room temperature                               | 6 min; room temperature                             | 60 min; refrigerator temperature          |
|                                                                                                                                                                                                                             | Working time     | 240 s                                                               | 20 min                                                | No data                                             | 30 s                                      |
|                                                                                                                                                                                                                             | Separation       | 4-8 mm                                                              | No data                                               | No data                                             | No data                                   |
| 7.                                                                                                                                                                                                                          | Expiry           |                                                                     |                                                       |                                                     |                                           |
|                                                                                                                                                                                                                             |                  | No data                                                             | No data                                               | 4 week; refrigerator in micro-tubes wrapped in foil | 7 day; room temperature without packaging |
| Note: <span style="background-color: red; color: black;"> </span> Not good; <span style="background-color: yellow; color: black;"> </span> Enough; <span style="background-color: green; color: black;"> </span> Very good. |                  |                                                                     |                                                       |                                                     |                                           |

## S10 Comparison efficiency on blood plasma separation

**Table S10** represents efficiency of methods and findings compared with our study. The efficiency of the separation was calculated by formula:

$$\text{Separated plasma (\%)} = (\text{separation} / \text{wicking}) \times 100 \% \quad (3)$$

$$\text{Entrapped plasma (\%)} = \text{plasma} - \text{separated plasma} \quad (4)$$

$$\text{Efficiency (\%)} = (\text{separated plasma} / \text{plasma}) \times 100 \% \quad (5)$$

**Table S10: Efficiency of methods and findings compared with our study**

| No                                                                                                                                                                                                                               | Parameters           | Ref S10.1 | Ref S10.2 | Ref S10.3 | This study |
|----------------------------------------------------------------------------------------------------------------------------------------------------------------------------------------------------------------------------------|----------------------|-----------|-----------|-----------|------------|
| 1                                                                                                                                                                                                                                | Blood source         | Rabbit    | Human     | Human     | Sheep      |
| 2                                                                                                                                                                                                                                | Haematocrit (%)      | 35        | 40        | 40        | 32         |
| 3                                                                                                                                                                                                                                | Plasma (%)           | 65        | 60        | 60        | 68         |
| 4                                                                                                                                                                                                                                | Blood volume (μL)    | 100       | 5         | 4         | 3          |
| 5                                                                                                                                                                                                                                | Wicking (mm)         | 13.0-15.5 | 8.0-9.0   | 9.0-9.5   | 25.0-30.0  |
| 6                                                                                                                                                                                                                                | Separation (mm)      | 8.0       | 1.0-2.0   | 3.0-3.5   | 3.0-3.8    |
| 7                                                                                                                                                                                                                                | Separated plasma (%) | 52-62     | 13-22     | 33-37     | 12-13      |
| 8                                                                                                                                                                                                                                | Entrapped plasma (%) | 3-13      | 38-47     | 23-27     | 55-56      |
| 9                                                                                                                                                                                                                                | Efficiency (%)       | 80-96     | 22-37     | 55-62     | 17-19      |
| Note:<br>Ref 1-3, haematocrit (%) and plasma (%) value was calculated from the normal value of rabbit and human. Furthermore, the length (mm) of wicking and separation was measured from the image presented on the manuscript. |                      |           |           |           |            |

### References S10:

**S10.1.** H. Li, D. Han, G. M. Pauletti and A. J. Steckl, *Lab Chip*, 2014, **14**, 4035-4041

**S10.2.** A. Nilghaz and W. Shen, *RSC Advances*, 2015, **5**, 53172-53179.

**S10.3.** D. Ballerini, X. Li and W. Shen, *Analytical and Bioanalytical Chemistry*, 2011, **399**, 1869-1875.

## S11 Comparison of calculated cost of used reagents

**Table S11.1** comparison of calculated cost in powder form of used reagents.

|                                                                                                                 | Ref S11.1                 | Ref S11.2              | Ref S11.2         | This study                  |
|-----------------------------------------------------------------------------------------------------------------|---------------------------|------------------------|-------------------|-----------------------------|
| Reagent                                                                                                         | CaCl <sub>2</sub>         | NaCl                   | MgCl <sub>2</sub> | EDTA                        |
| Specification                                                                                                   | Anhydrous, powder, ≥ 97 % | BioXtra, ≥ 99.5 % (AT) | Anhydrous, ≥ 98 % | BioUltra, Anhydrous, ≥ 99 % |
| Company brand                                                                                                   | Sigma-Aldrich             | Sigma-Aldrich          | Sigma             | Sigma-Aldrich               |
| CAS number                                                                                                      | 10043-52-4                | 7647-14-5              | 7786-30-3         | 60-00-4                     |
| Form                                                                                                            | Powder                    | Powder                 | Powder            | Powder                      |
| Packaging (g)                                                                                                   | 100                       | 250                    | 100               | 100                         |
| Price/pack (SGD)                                                                                                | 122.50                    | 78.20                  | 103.00            | 48.70                       |
| Price/g (SGD)                                                                                                   | 1.225                     | 0.313                  | 1.030             | 0.487                       |
| Note: *accessed from <a href="http://www.sigmaaldrich.com/">http://www.sigmaaldrich.com/</a> (date: 02/02/2016) |                           |                        |                   |                             |

**Table S11.2** comparison of calculated cost in solution form of used reagents.

|                                                                                                                 | Ref S11.1                       | Ref S11.2                       | Ref S11.2             | This study                              |
|-----------------------------------------------------------------------------------------------------------------|---------------------------------|---------------------------------|-----------------------|-----------------------------------------|
| Reagent                                                                                                         | CaCl <sub>2</sub>               | NaCl                            | MgCl <sub>2</sub>     | EDTA                                    |
| Specification                                                                                                   | BioUltra, for molecular biology | BioUltra, for molecular biology | for molecular biology | BioUltra, for molecular biology, pH 8.0 |
| Company brand                                                                                                   | Sigma                           | Sigma                           | Sigma                 | Sigma-Aldrich                           |
| Concentration (M)                                                                                               | 1                               | 5                               | 1                     | 0.5                                     |
| CAS number                                                                                                      | 10043-52-4                      | 7647-14-5                       | 7786-30-3             | 60-00-4                                 |
| Form                                                                                                            | Solution                        | Solution                        | Solution              | Solution                                |
| Packaging (mL)                                                                                                  | 1                               | 1000                            | 100                   | 100                                     |
| Price (SGD)                                                                                                     | 74.30                           | 169.50                          | 89.10                 | 74.90                                   |
| Price (SGD)                                                                                                     |                                 |                                 |                       |                                         |
| Price/M                                                                                                         | 74.30                           | 33.90                           | 89.10                 | 149.80                                  |
| Price/M/mL                                                                                                      | 74.30                           | 0.034                           | 0.891                 | 1.498                                   |
| In device application                                                                                           |                                 |                                 |                       |                                         |
| Concentration (M)                                                                                               | 0.5                             | 1                               | 0.67                  | 0.1                                     |
| Immobilized (μL)                                                                                                | 15                              | 0.5                             | 0.5                   | 1                                       |
| Cost/application (SGD)                                                                                          | 557.250                         | 0.017                           | 0.298                 | 0.150                                   |
| Note: *accessed from <a href="http://www.sigmaaldrich.com/">http://www.sigmaaldrich.com/</a> (date: 02/02/2016) |                                 |                                 |                       |                                         |

### References S11:

**S11.1.** H. Li, D. Han, G. M. Pauletti and A. J. Steckl, *Lab Chip*, 2014, **14**, 4035-4041.

**S11.2.** A. Nilghaz and W. Shen, *RSC Advances*, 2015, **5**, 53172-53179.



## S12 Miniaturize platform and comparison of albumin assay

**Figure S12** represents miniaturized length of  $\mu$ TAD. Regarding to previous results on 50 mm thread length platform, therein shows that only 30-35 mm length the blood wick on-thread. Furthermore, the  $\mu$ TAD platforms were then miniaturized from 50 mm into 30 mm length. A more small volume of fluids, 1  $\mu$ L EDTA, 1  $\mu$ L albumin (BSA) and 2  $\mu$ L distilled water or BCG were used in albumin detection in artificial blood plasma.

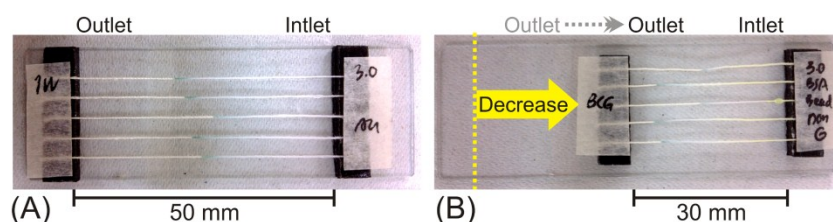

**Figure S12:** Miniaturize length of  $\mu$ TAD from (A) 50 mm into (B) 30 mm.

**Table S12.1:** Comparison of albumin detection using bromocresol green (BCG) kits

[illegible]

## S13 Comparison among several commercial products

Table S13 represents comparison between several commercial blood analyzer tools.

**Table S13: Comparison among several commercial products**

| Comparison                                                                                                                                                                                                                                                                                                                                                                                                                                                                                                                                                                                                                                                                                                                                                                                                                                                                                                                                                                                                                                                                                                                                                                                                | Comercial products                                                                                                                  |                                                                                                                               |                                                              |                                                                             | This study                               |
|-----------------------------------------------------------------------------------------------------------------------------------------------------------------------------------------------------------------------------------------------------------------------------------------------------------------------------------------------------------------------------------------------------------------------------------------------------------------------------------------------------------------------------------------------------------------------------------------------------------------------------------------------------------------------------------------------------------------------------------------------------------------------------------------------------------------------------------------------------------------------------------------------------------------------------------------------------------------------------------------------------------------------------------------------------------------------------------------------------------------------------------------------------------------------------------------------------------|-------------------------------------------------------------------------------------------------------------------------------------|-------------------------------------------------------------------------------------------------------------------------------|--------------------------------------------------------------|-----------------------------------------------------------------------------|------------------------------------------|
|                                                                                                                                                                                                                                                                                                                                                                                                                                                                                                                                                                                                                                                                                                                                                                                                                                                                                                                                                                                                                                                                                                                                                                                                           | i-STAT 1*<br>Abbott, New York                                                                                                       | Element POC<br>Heska, Colorado***                                                                                             | VetScan**<br>Abaxis, Canada                                  | Element DC<br>Heska,<br>Colorado                                            | µTAD                                     |
| Unit type                                                                                                                                                                                                                                                                                                                                                                                                                                                                                                                                                                                                                                                                                                                                                                                                                                                                                                                                                                                                                                                                                                                                                                                                 | Portable                                                                                                                            | Portable                                                                                                                      | Stationer                                                    | Stationer                                                                   | Portable                                 |
| Parameter(s)                                                                                                                                                                                                                                                                                                                                                                                                                                                                                                                                                                                                                                                                                                                                                                                                                                                                                                                                                                                                                                                                                                                                                                                              | 12                                                                                                                                  | 11                                                                                                                            | 10                                                           | 12                                                                          | 1                                        |
| Biochemistry                                                                                                                                                                                                                                                                                                                                                                                                                                                                                                                                                                                                                                                                                                                                                                                                                                                                                                                                                                                                                                                                                                                                                                                              | iCa, Na <sup>+</sup> , K <sup>+</sup> , Cl <sup>-</sup> , L, BUN, UREA, Glu, Creat, pH, PCO <sub>2</sub> , PO <sub>2</sub> , No ALB | iCa, Na <sup>+</sup> , K <sup>+</sup> , Cl <sup>-</sup> , L, Glu, Creat, Hct, pH, PCO <sub>2</sub> , PO <sub>2</sub> , No ALB | ALB, ALP, AST, Ca <sup>2+</sup> , CK, GGT, Mg, PHOS, TP, BUN | ALP, ALT, BUN, CREA, Glu, TP, TBIL, ALB, PHOS, Ca <sup>2+</sup> , CHOL, GGT | ALB                                      |
| Volume                                                                                                                                                                                                                                                                                                                                                                                                                                                                                                                                                                                                                                                                                                                                                                                                                                                                                                                                                                                                                                                                                                                                                                                                    | 300-450 µL****                                                                                                                      | ~100 µL                                                                                                                       | 90-120 µL                                                    | 50 µL                                                                       | 1-3 µL                                   |
| Vol/parameter                                                                                                                                                                                                                                                                                                                                                                                                                                                                                                                                                                                                                                                                                                                                                                                                                                                                                                                                                                                                                                                                                                                                                                                             | 17-95 µL                                                                                                                            | 9 µL                                                                                                                          | 9-12 µL                                                      | 4 µL                                                                        | 1-3 µL                                   |
| Preparation                                                                                                                                                                                                                                                                                                                                                                                                                                                                                                                                                                                                                                                                                                                                                                                                                                                                                                                                                                                                                                                                                                                                                                                               | No need                                                                                                                             | No need                                                                                                                       | 600 s                                                        | 60-360 s                                                                    | No need                                  |
| Calibration                                                                                                                                                                                                                                                                                                                                                                                                                                                                                                                                                                                                                                                                                                                                                                                                                                                                                                                                                                                                                                                                                                                                                                                               | In device-calibration                                                                                                               | 165 s (card)                                                                                                                  | In device-calibration                                        | No data                                                                     | In device - calibration                  |
| Working                                                                                                                                                                                                                                                                                                                                                                                                                                                                                                                                                                                                                                                                                                                                                                                                                                                                                                                                                                                                                                                                                                                                                                                                   | 130-1000 s                                                                                                                          | 35 s                                                                                                                          | 840 s                                                        | 300 s                                                                       | 120 s                                    |
| Total time                                                                                                                                                                                                                                                                                                                                                                                                                                                                                                                                                                                                                                                                                                                                                                                                                                                                                                                                                                                                                                                                                                                                                                                                | 130-1000 s                                                                                                                          | 200 s                                                                                                                         | 1440 s                                                       | 360-660 s                                                                   | 120 s                                    |
| System                                                                                                                                                                                                                                                                                                                                                                                                                                                                                                                                                                                                                                                                                                                                                                                                                                                                                                                                                                                                                                                                                                                                                                                                    | potentiometry, hydrolyzed, conductometrically, amperometrically,                                                                    | potentiometry, conductometrically, amperometrically,                                                                          | colorimetry                                                  | colorimetry, potentiometry                                                  | colorimetry                              |
| Energy                                                                                                                                                                                                                                                                                                                                                                                                                                                                                                                                                                                                                                                                                                                                                                                                                                                                                                                                                                                                                                                                                                                                                                                                    | AC 100-240 Volts<br>DC 2x9 Volts<br>Lithium-ion Batteries                                                                           | AC 100-240 Volts<br>DC Lithium-ion Batteries                                                                                  | AC 100-240 Volts                                             | AC 100-240 Volts                                                            | No external energy                       |
| System                                                                                                                                                                                                                                                                                                                                                                                                                                                                                                                                                                                                                                                                                                                                                                                                                                                                                                                                                                                                                                                                                                                                                                                                    | Cartridge-based system                                                                                                              | Card-based system                                                                                                             | Rotor-based liquid embed reagents                            | E-wrap panels system (embed drying reagent)                                 | Microfluidic cotton-embed drying reagent |
| Type                                                                                                                                                                                                                                                                                                                                                                                                                                                                                                                                                                                                                                                                                                                                                                                                                                                                                                                                                                                                                                                                                                                                                                                                      | 19 different cartridge                                                                                                              | 1 card                                                                                                                        | 10 different rotor                                           | 1 panel                                                                     | 1 glass slide                            |
| Storage                                                                                                                                                                                                                                                                                                                                                                                                                                                                                                                                                                                                                                                                                                                                                                                                                                                                                                                                                                                                                                                                                                                                                                                                   | 2-8 °C ( <i>long-time</i> )<br>18-30 °C ( <i>fast-time</i> )                                                                        | 18-30 °C                                                                                                                      | 2-8 °C                                                       | 18-30 °C                                                                    | 25-30 °C                                 |
| Expiry                                                                                                                                                                                                                                                                                                                                                                                                                                                                                                                                                                                                                                                                                                                                                                                                                                                                                                                                                                                                                                                                                                                                                                                                    | 5 min (25 °C)-individual cartridge<br>1 h (25 °C)-cartridges box                                                                    | No data                                                                                                                       | 20 min (25 °C)-open pack<br>48 h (25 °C)-closed pack         | No data                                                                     | 168 h-no packaging                       |
| Note:<br>*) <a href="https://www.abbottpointofcare.com/products-services/istat-test-cartridges/menu">https://www.abbottpointofcare.com/products-services/istat-test-cartridges/menu</a> ; i-STAT Manual ART: 714446-00S; **) Abaxis VetScan® leflet (PN: 500-7113 Rev: C); ***) <a href="https://www.heska.com/Products/Lab-Systems.aspx">https://www.heska.com/Products/Lab-Systems.aspx</a> ; ****) 2-3 drops; 1 drop = 150µL; Albumin (ALB), Alkaline phosphatase (ALP), Aspartate aminotransferase (AST), Calcium (Ca <sup>2+</sup> ), Creatine kinase (CK), Gamma glutamyl transferase (GGT), Magnesium (Mg), Inorganic phosphorus (PHOS), Total protein (TP), Urea nitrogen (BUN), Sodium (Na), Potassium (K), Chloride (Cl), Glucose (GLU), Creatinine (CREAT), Ionized Calcium (iCa), pH, Carbon dioxide (PCO <sub>2</sub> ), Oxygen (PO <sub>2</sub> ), TCO <sub>2</sub> , Lactate (L), Haematocrite (Hct), Haemoglobine (Hb); Total bilirubin (TBIL); Cholesterol (CHOL); <span style="background-color: red; color: black;"> </span> Not good; <span style="background-color: yellow; color: black;"> </span> Enough; <span style="background-color: green; color: black;"> </span> Very good. |                                                                                                                                     |                                                                                                                               |                                                              |                                                                             |                                          |

## S14 Comparison of LoD and LoQ between separation and centrifugation

**Table S14** presents comparison of Limit of Detection (LoD) and Limit of Quantification (LoQ) of semi-quantitative albumin detection in artificial blood using  $\mu$ TAD by separation and centrifugation methods. The LoD value of separation and centrifugation were 0.0114 g/dL and 0.0133 g/dL, respectively. Moreover, the LoQ value of separation and centrifugation were 0.0381 g/dL and 0.0442 g/dL, respectively.

**Table S14:** Comparison of Limit of Detection (LoD) and Limit of Quantification (LoQ).

| Artificial blood                              | Separation                                                                                                                   |                              | Centrifugation                                                                                                               |                               |
|-----------------------------------------------|------------------------------------------------------------------------------------------------------------------------------|------------------------------|------------------------------------------------------------------------------------------------------------------------------|-------------------------------|
| Curve equation ( $Y_1, X_1; \dots; Y_5 X_5$ ) | $y = 0.6484 \ln(x) + 0.002$                                                                                                  |                              | $y = 0.6265 \ln(x) - 0.0128$                                                                                                 |                               |
| R square                                      | 0.991                                                                                                                        |                              | 0.995                                                                                                                        |                               |
| Slope                                         | 0.6484                                                                                                                       |                              | 0.6265                                                                                                                       |                               |
| Original colour intensity data                |                                                                                                                              |                              |                                                                                                                              |                               |
| Value of $Y_1; X_1$                           | $Y_1$ (a.u.)                                                                                                                 | $X_1 = e^{(y-0.002)/0.6484}$ | $Y_1$ (a.u.)                                                                                                                 | $X_1 = e^{(y+0.0128)/0.6265}$ |
| 1                                             | 0.000556                                                                                                                     | 0.977976                     | 0.010625                                                                                                                     | 1.038098                      |
| 2                                             | 0.000734                                                                                                                     | 0.980669                     | 0.009306                                                                                                                     | 1.035915                      |
| 3                                             | 0.000631                                                                                                                     | 0.979102                     | 0.006597                                                                                                                     | 1.031445                      |
| 4                                             | 0.000347                                                                                                                     | 0.974829                     | 0.008958                                                                                                                     | 1.035340                      |
| Mean of $Y_1; X_1$                            | 0.000567                                                                                                                     | 0.978144                     | 0.008872                                                                                                                     | 1.035199                      |
| Standard deviation ( $SD_1$ )                 | 0.000164                                                                                                                     | 0.002471                     | 0.001678                                                                                                                     | 0.002771                      |
| LoD calculation                               |                                                                                                                              |                              |                                                                                                                              |                               |
| LoD                                           | $= (3 \times SD_{X_1})/\text{slope}$<br>$= (3 \times 0.002471) / 0.6484$<br>$= 0.0114 \text{ g/dL} \sim 0.01 \text{ g/dL}$   |                              | $= (3 \times SD_{X_1})/\text{slope}$<br>$= (3 \times 0.002771) / 0.6265$<br>$= 0.0133 \text{ g/dL} \sim 0.01 \text{ g/dL}$   |                               |
| LoQ calculation                               |                                                                                                                              |                              |                                                                                                                              |                               |
| LoQ                                           | $= (10 \times SD_{X_1})/\text{slope}$<br>$= (10 \times 0.002471) / 0.6484$<br>$= 0.0381 \text{ g/dL} \sim 0.04 \text{ g/dL}$ |                              | $= (10 \times SD_{X_1})/\text{slope}$<br>$= (10 \times 0.002771) / 0.6265$<br>$= 0.0442 \text{ g/dL} \sim 0.04 \text{ g/dL}$ |                               |

## S15 Comparison of mechanism and separated products

**Table S15** comparison of several mechanisms on blood plasma separation using simple and low-cost device

| No | Sampling                                                                                                      | Sample processing steps                                                                                                                                                    | Mechanism of separation                                                                                                                                                                                                                                                                                                | Separated product                                                                                                                                | Ref.       |
|----|---------------------------------------------------------------------------------------------------------------|----------------------------------------------------------------------------------------------------------------------------------------------------------------------------|------------------------------------------------------------------------------------------------------------------------------------------------------------------------------------------------------------------------------------------------------------------------------------------------------------------------|--------------------------------------------------------------------------------------------------------------------------------------------------|------------|
| 1  | Conventional plasma:<br>Blood + anticoagulant (e.g. EDTA, citrate, heparine, hirudin)                         | (1) whole blood centrifugation,<br>(2) separation                                                                                                                          | <b>Mechanical force:</b><br>Anticoagulant prevent blood to clot and centrifugal force separated plasma                                                                                                                                                                                                                 | Pure plasma                                                                                                                                      | S15.1      |
| 2  | Conventional serum:<br>Blood + without anticoagulant (e.g. plain) or using coagulant ( e.g. $\text{CaCl}_2$ ) | (1) clotted blood centrifugation,<br>(2) separation                                                                                                                        | <b>Mechanical force:</b><br>Coagulant induce blood to clot and centrifugal force separated serum                                                                                                                                                                                                                       | Pure serum                                                                                                                                       | S15.1      |
| 3  | LFA device:<br>Blood + anticoagulant (citrate)                                                                | (1) diluted blood,<br>(2) total blood clot,<br>(3) filtration<br><br>NaCl solution + blood + $\text{CaCl}_2$ solution                                                      | <b>Hard osmotic-induce:</b><br>Excess Ca from $\text{CaCl}_2$ salt in hypertonic solution induce <u>totally diluted blood to clotting</u> and nitrocellulose paper used as filter to separated plasma-serum in lateral flow capillarity action                                                                         | Diluted plasma-serum ( <b>water-contaminant</b> ) + Na and Ca ( <b>salt-contaminant</b> )                                                        | S15.2      |
| 4  | $\mu$ PAD:<br>Blood + anticoagulant (Li-heparin)                                                              | (1) diluted blood,<br>(2) cells shrivel,<br>(3) partial clot,<br>(4) separation<br><br>NaCl solution + blood,<br><br>$\text{MgCl}_2$ solution + blood                      | <b>Soft osmotic-induce:</b><br>Excess Na or Mg from NaCl or $\text{MgCl}_2$ salt, respectively induce <u>partially of blood cells shrivelled, coagulation and entrapped the</u> blood cells in hypertonic solution at functionalized-Whatman filter paper to separated plasma-serum by lateral flow capillarity action | Diluted plasma-serum ( <b>water-contaminant</b> ) + Na or Mg ( <b>salt-contaminant</b> ) + intracellular fluid ( <b>fluid cell-contaminant</b> ) | S15.3      |
| 5  | $\mu$ TAD :<br>Blood + anticoagulant (citrate)                                                                | (1) diluted blood,<br>(2) twist per inch sorting,<br>(3) separation                                                                                                        | <b>Twist per inch:</b><br>Excess anticoagulant boosting blood wick and separating blood cells and plasma                                                                                                                                                                                                               | Diluted plasma-serum ( <b>anticoagulant-contaminant</b> )                                                                                        | S15.4      |
| 6  | $\mu$ TAD :<br>Blood + anticoagulant (EDTA.K3)                                                                | (1) EDTA dissolve<br>(2) fibrin-filter from less part of blood clot at downstream blood wicking (cotton-fiber),<br>(3) separation<br><br>EDTA-dried + blood + cotton-fiber | <b>Fibrin-filter:</b><br>EDTA treatment (dried) delayed blood to clot that induced by surface charge of cotton-fiber, especially at the downstream wicking blood (free EDTA thread part). Fibrin snare formed and functionalized as filter, namely fibrin-filter.                                                      | Plasma-serum                                                                                                                                     | This study |

### References S15:

- S15.1.** B. H. Estridge, *Basic Medical Laboratory Techniques*, Cengage Learning, 2002.  
**S15.2.** H. Li, D. Han, G. M. Pauletti and A. J. Steckl, *Lab Chip*, 2014, **14**, 4035-4041.  
**S15.3.** A. Nilghaz and W. Shen, *RSC Advances*, 2015, **5**, 53172-53179.  
**S15.4.** F. Yazdani, S. Sadir, F. Z. Huyop and D. H. B. Wicaksono, *Advanced Materials Research*, 2015, **1112**, 437-440.
